# Supplementary material for: Three-dimensional macroporous W2C inverse opal arrays for the efficient hydrogen evolution reaction
Source: Royal Society of Chemistry journal article supplement (doi:10.1039/c9nr03548f), 2019-01-01
Supplement: c9nr03548f1.pdf [file c9nr03548f1.pdf]

## Supplementary Materials

### Three-dimensional macroporous $W_2C$ inverse opals arrays for efficient hydrogen evolution reaction

Haifeng Zhang<sup>†,‡</sup>, Qin Pan<sup>§</sup>, Zhipeng Sun<sup>\*,†,‡</sup> and Chuanwei Cheng<sup>\*,§</sup> <sup>||</sup>

<sup>†</sup>Materials and Energy School, Guangdong University of Technology, No. 100 Waihuan Xi Road, Guang Zhou Higher Education Mega Center, Panyu District, Guangzhou 510006, P.R China

<sup>‡</sup>Dongguan South China Design Innovation Institute, Dongguan 523808, P.R China

<sup>§</sup>Shanghai Key Laboratory of Special Artificial Microstructure Materials and Technology, School of Physics Science and Engineering, Tongji University, Shanghai 200092, P.R. China

<sup>||</sup>Institute of Dongguan-Tongji University, Dongguan, Guangdong, 523808, P.R. China

\*Corresponding authors: [zpsunxj@163.com](mailto:zpsunxj@163.com); [cwcheng@tongji.edu.cn](mailto:cwcheng@tongji.edu.cn)

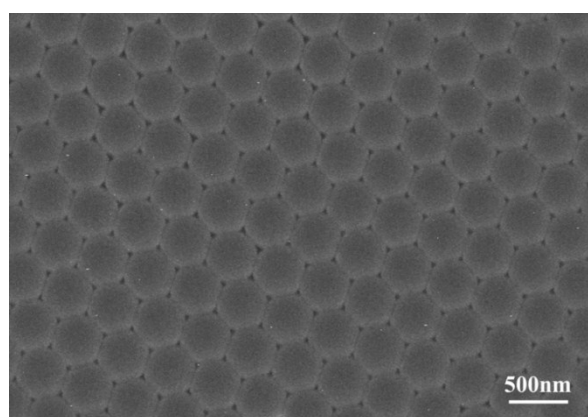

**Fig S1** SEM images of PS opal sacrificial templates.

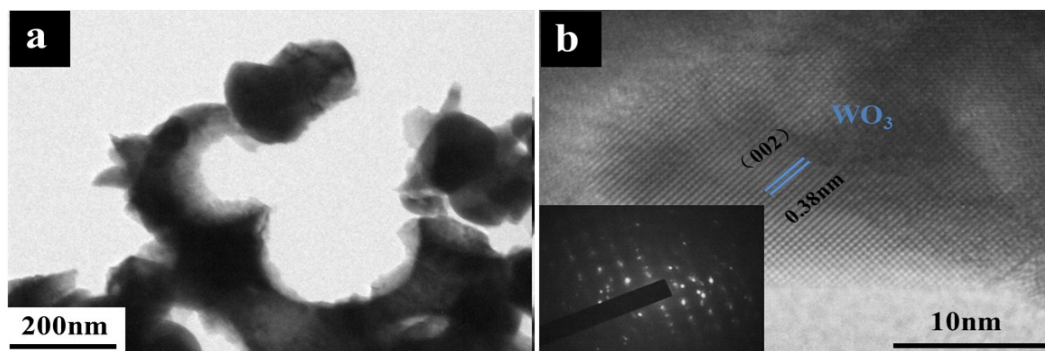

**Fig S2** (a) TEM and (b) HRTEM image of WO<sub>3</sub> IO, inset in Fig S2 (b) is the SAED patterns

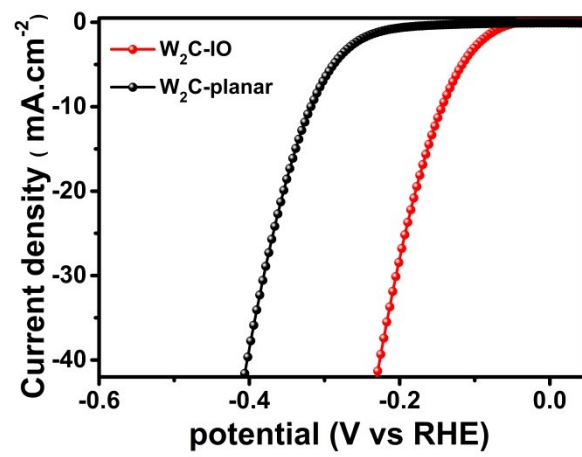

**Fig S3.** Polarization curves of W<sub>2</sub>C IO and planar W<sub>2</sub>C films in 0.5 M H<sub>2</sub>SO<sub>4</sub>

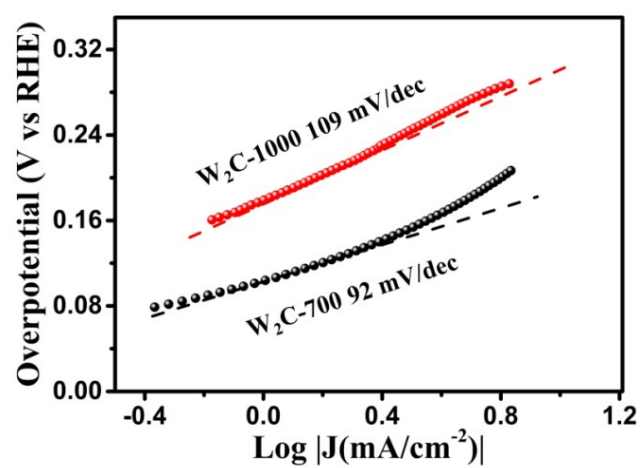

**Fig S4.** Tafel plots of W<sub>2</sub>C-700 and W<sub>2</sub>C-1000.

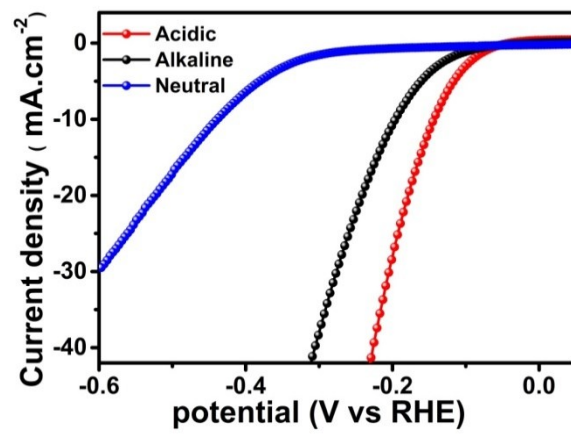

**Fig S5.** HER performance of W<sub>2</sub>C-850 IO in different electrolytes (Neutral, Alkaline and Acidic).

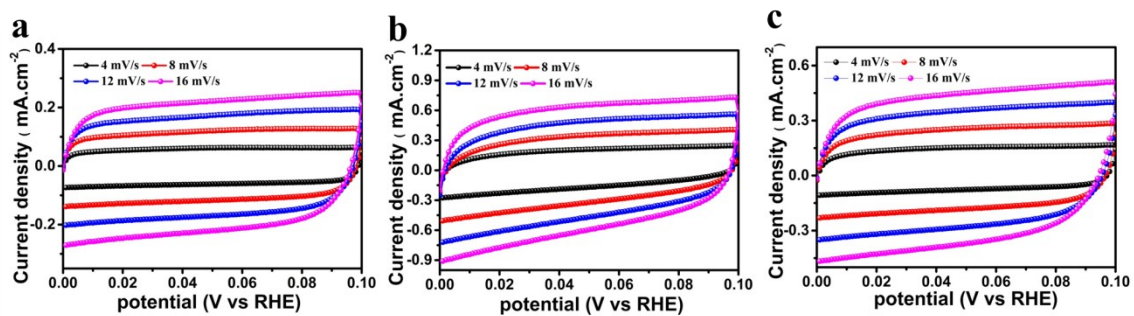

**Fig S6.** the CVs for (a) WO<sub>3</sub> IO, (b) W<sub>2</sub>C IO-700 and (c) W<sub>2</sub>C IO-1000 with different rates from 4 to 16 mV/s in the potential range from 0 to 1 V (vs RHE).

**Table S1.** A comparison of the HER performances of non-precious metal based electrocatalysts from recent literatures.

| electrocatalyst            | Electrolyte                          | $-10\text{mAcm}^{-2}$ (mV) | Reference |
|----------------------------|--------------------------------------|----------------------------|-----------|
| W <sub>2</sub> C IO        | 0.5 M H <sub>2</sub> SO <sub>4</sub> | -146                       | Our study |
| Mo <sub>2</sub> C NPs      | 1 M H <sub>2</sub> SO <sub>4</sub>   | -220                       | Ref.1     |
| WS <sub>2</sub> Clusters   | 0.5 M H <sub>2</sub> SO <sub>4</sub> | -160                       | Ref.2     |
| Fe-WCN Nanoflake           | 0.5 M H <sub>2</sub> SO <sub>4</sub> | -250                       | Ref.3     |
| MoS Clusters               | 0.5 M H <sub>2</sub> SO <sub>4</sub> | -183                       | Ref.4     |
| MoS <sub>2</sub> NPs       | 0.5 M H <sub>2</sub> SO <sub>4</sub> | -219                       | Ref.5     |
| W <sub>2</sub> C NPs       | 0.5 M H <sub>2</sub> SO <sub>4</sub> | -120                       | Ref.6     |
| MoC-Mo <sub>2</sub> C HNWS | 0.5 M H <sub>2</sub> SO <sub>4</sub> | -126                       | Ref.7     |
| Mo <sub>2</sub> C NPs/G    | 0.5 M H <sub>2</sub> SO <sub>4</sub> | -150                       | Ref.8     |

|                          | Pt             | WO <sub>3</sub> -W | WO <sub>3</sub> -O | W <sub>2</sub> C-C | W <sub>2</sub> C-W |
|--------------------------|----------------|--------------------|--------------------|--------------------|--------------------|
| <b>E<sub>base</sub></b>  | <b>-117.09</b> | <b>-117.09</b>     | <b>-117.09</b>     | <b>-117.09</b>     | <b>-117.09</b>     |
| <b>E<sub>ads</sub></b>   | <b>-6.759</b>  | <b>-6.759</b>      | <b>-6.759</b>      | <b>-6.759</b>      | <b>-6.759</b>      |
| <b>E<sub>total</sub></b> | <b>-120.89</b> | <b>-425.83</b>     | <b>-425.42</b>     | <b>-408.60</b>     | <b>-412.87</b>     |
| <b>ΔE<sub>ads</sub></b>  | <b>-0.42</b>   | <b>0.03</b>        | <b>0.38</b>        | <b>-0.86</b>       | <b>-0.44</b>       |
| <b>ΔG<sub>H</sub></b>    | <b>-0.18</b>   | <b>0.21</b>        | <b>0.62</b>        | <b>-0.62</b>       | <b>-0.20</b>       |

**Table S2** E<sub>base</sub>, E<sub>ads</sub>, E<sub>total</sub> ΔE<sub>ads</sub> and ΔG<sub>H</sub> for HER on Pt (111) surface, WO<sub>3</sub>-W (001) surface, WO<sub>3</sub>-O (001) surface, W<sub>2</sub>C-C (001) surface and W<sub>2</sub>C-W (001) surface by DFT calculation.

**Theoretical calculations:** Our computational simulations were performed by Vienna ab-initio simulation package (VASP) with the projector augmented wave pseudo-potentials (PAW) to describe the interaction between atomic cores and valence electrons with density functional theory (DFT). The Perdew–Burke–Ernzerhof (PBE) functional within the generalized gradient approximation (GGA) was used to implement DFT calculations.<sup>9</sup> The W<sub>2</sub>C(001) by the W-determined or C-determined, Pt(111) and WO<sub>3</sub>(001) 2×2 slab models were employed to simulate the surface properties. The reasonable vacuum layers were set around 15 Å in the z-direction for avoiding interaction between planes. A cutoff energy of 400 eV was provided and a 5×5×1 Monkhorst Pack k-point sampling was chosen for the well converged energy values. Geometry optimizations were pursued until the force on each atom falls below the convergence criterion of 0.02 eV/Å and energies were converged within 10<sup>-6</sup> eV. Moreover, all calculations were spin polarized.

### Hydrogen adsorption and free energy

The hydrogen adsorption energy on various surfaces is defined as

$$\Delta E_{ads} = E_{base-H} - E_{base} - \frac{1}{2}E_{H_2}$$

where  $E_{base-H}$  is the total energy of slab model with \*H adsorption,  $E_{base}$  is the energy of a clean slab surface, and  $E_{H_2}$  is that for hydrogen molecules in the gas phase.

The Gibbs free energy for hydrogen adsorption ( $\Delta G_{H^*}$ ) can be calculated by taking zero point energy and entropy corrections into account such that  $\Delta G_H = \Delta E_{ads} + \Delta E_{ZPE} - T\Delta S$ . Where  $\Delta E_{ZPE}$  and  $T\Delta S$  are the difference in zero point



energy and entropy between the adsorbed hydrogen and hydrogen in the gas phase, respectively. As the vibrational entropy of H\* in the adsorbed state is small, the

entropy of adsorption of  $1/2 H_2$  is  $\Delta S_H \approx \Delta E_{ads} + 0.24 eV$ .<sup>10,11</sup>

## References

1. H. Vrubel and X. Hu, *Angew. Chem. Int. Ed.*, 2012, **51**, 12703.
2. L. Cheng, W. J. Huang, Q. F. Gong, C. H. Liu, Z. Liu, Y. G. Li and H. J. Dai, *Angew. Chem. Int. Ed.*, 2014, **53**, 7860.
3. Y. Zhao, K. Kamiya, K. Hashimoto and S. Nakanishi, *Angew Chem Int Ed*, 2013, **52**, 13638.
4. J. Kibsgaard, TF. Jaramillo and F. Besenbacher, *Nat Chem*, 2014, **6**, 248.
5. H. Deng, C. Zhang, Y. C. Xie, T. Tumlin, L. Giri, S. P. Karna and J. Lin, *J Mater Chem A*, 2016, **4**, 6824.
6. Q. F. Gong, Y. Wang, Q. Hu, J. G. Zhou, RF. Feng, P. N. Duchesne, P. Zhang, F. J. Chen. N. Han, Y. F. Li, CH. Jin, Y. G. Li and S. T. Lee, *Nat Commun*, 2016, **7**, 13216.
7. H. L. Lin, Z. P. Shi, S. N. He, X. Yu, S. N. Wang, Q. S. Gao and Y. Tang, *Chem Sci*, 2016, **7**, 3399.
8. C. He and J. Tao, *Chem Commun*, 2015, **51**, 8323.
9. M. Bajdich, M. Garcia-Mota, A. Vojvodic, J. K. Norskov and A. T. Bell, *J. Am. Chem. Soc.* 2013, **135**, 13521.
10. Y. Jiao, Y. Zheng, K. Davey and S. Z. Qiao, *Nat Energy* 2016, **1**, 16130.
11. C. Zhang, Y. Huang, Y. Yu, J. Zhang, S. Zhuo, B. Zhang, *Chem Sci*, 2017, **8**, 2769.
